# Supplementary material for: Interplays between cis- and trans-Acting Factors for Alternative Splicing in Response to Environmental Changes during Biological Invasions of Ascidians
Source: MDPI journal article supplement (doi:10.3390/ijms241914921), 2023-10-05
Supplement: s1 [file s1]

**Figure S1.** GO enrichment analysis of genes with different exon numbers. (A) genes with only one exon in *C. robusta*; (B) genes with only one exon in *C. savignyi*; (C) genes with more than ten exons in *C. robusta*; (D) genes with more than ten exons in *C. savignyi*.

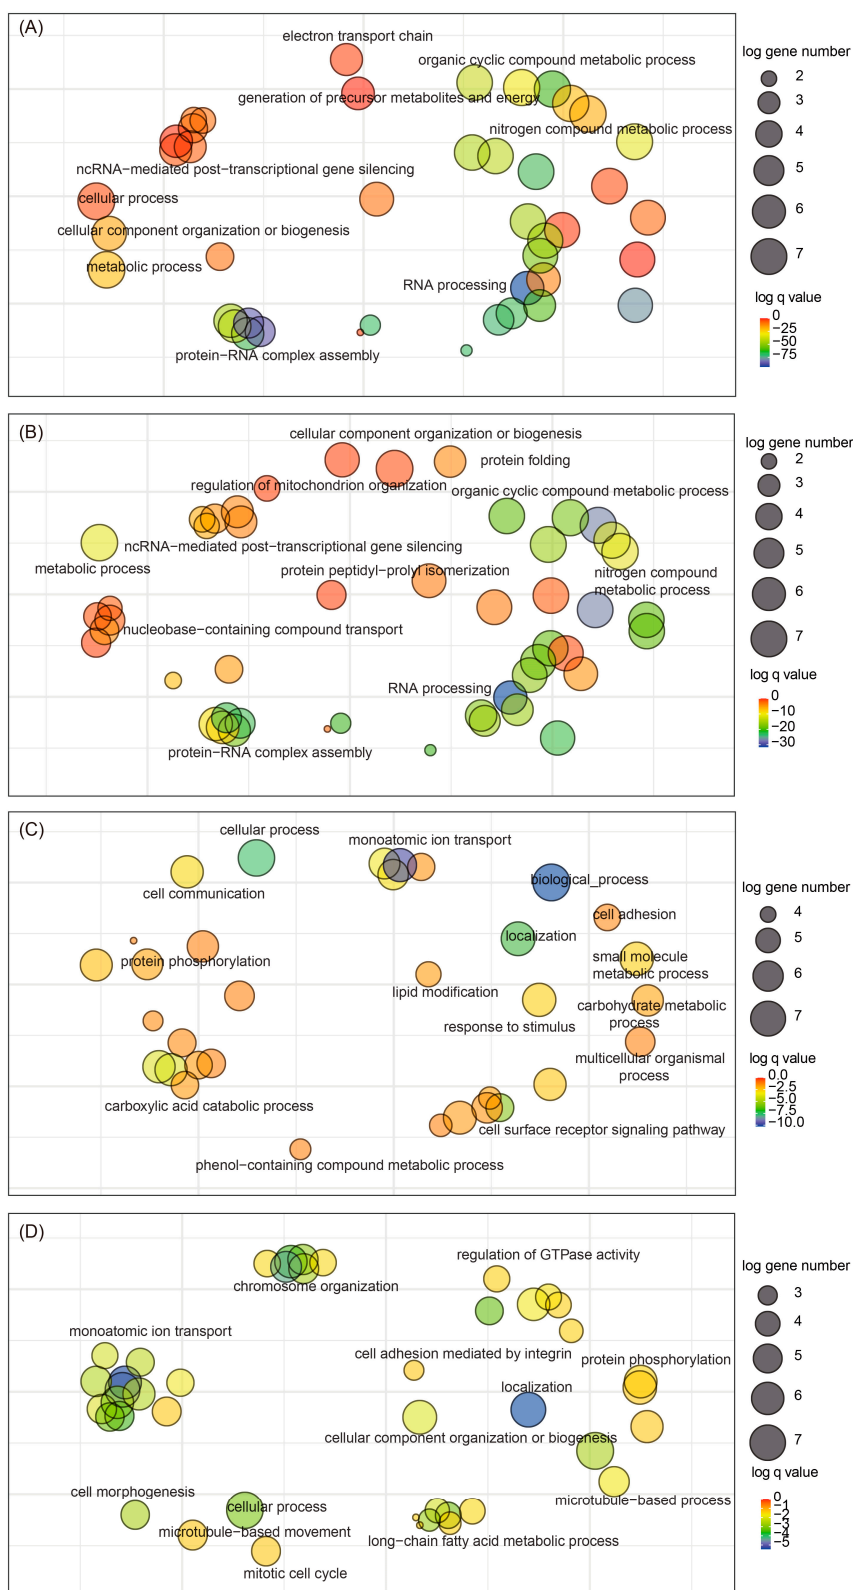

**Table S1** Comparisons of different alternative splicing types in congeneric ascidians under different environmental stresses

| <b>Species under stress</b>                 | <b>SE</b> | <b>MXE</b> | <b>A3SS</b> | <b>A5SS</b> | <b>RI</b> |
|---------------------------------------------|-----------|------------|-------------|-------------|-----------|
| <i>C. robusta</i> under salinity stress     | 92.2%     | 5.8%       | 1.1%        | 0.8%        | 0.01%     |
| <i>C. savignyi</i> under salinity stress    | 70.7%     | 11.7%      | 6.96%       | 10.38%      | 0.24%     |
| <i>C. savignyi</i> under temperature stress | 51.8%     | 10.2%      | 11.03%      | 23.48%      | 3.41%     |
